1  
2  
3  
4  
5  
6  
7  
8  
9  
10  
11  
12  
13  
14  
15  
16  
17  
18  
19  
20  
21  
22

## Buzzing during biosonar-based interception of prey in the delphinids *Tursiops truncatus* and *Pseudorca crassidens*

Wisniewska D.M.\*<sup>1,2</sup>, Johnson M.<sup>3</sup>, Nachtigall P.<sup>4</sup> and Madsen P.T.<sup>2</sup>

1) Marine Mammal Research, Bioscience, Aarhus University, Denmark

2) Zoophysiology, Bioscience, Aarhus University, Denmark

3) Scottish Oceans Institute, University of St Andrews, Scotland

4) Marine Mammal Research Program, HIMB, Hawaii, USA

\* [danuta.wisniewska@biology.au.dk](mailto:danuta.wisniewska@biology.au.dk)

Short title: *Delphinids buzz for prey interception*

23 **Abstract**

24 Echolocating bats and toothed whales probe their environment with ultrasonic sound pulses, using  
25 returning echoes to navigate and find prey in a process that appears to have resulted from a  
26 remarkable convergence of the two taxa. Here we report the first detailed quantification of  
27 echolocation behaviour during prey capture in the most studied delphinid species, a false killer  
28 whale and a bottlenose dolphin. Using acoustic DTAGs, we demonstrate that just prior to prey  
29 interception these delphinids change their acoustic gaze dramatically by reducing inter-click  
30 intervals and outputs >10-fold in a high-repetition-rate, low output buzz. Buzz click rates of 250-  
31 500 Hz for large, but agile animals, suggest that sampling rates during capture are scaled with the  
32 whales' manoeuvrability. These observations support the growing notion that fast sonar sampling  
33 accompanied by low output level is critical for high-rate feedback to inform motor patterns during  
34 prey interception in all echolocating toothed whales.

35

36 **Keywords:** echolocation, buzz, convergent evolution, prey capture, delphinid, DTAG

37

38

39

40

41

42

43

44

45

46

47

## 48 **Introduction**

49 Echolocating bats and toothed whales emit powerful sound pulses and listen for returning echoes to  
50 navigate and capture prey under poor lighting (Griffin et al., 1960; Au, 1993). The pulse repetition  
51 rate and the output energy together delimit the depth of an echolocator's acoustic gaze for  
52 unambiguous echo ranging (Wisniewska et al., 2012; Madsen and Surlykke, 2013). Early on,  
53 Griffin et al. (Griffin et al., 1960) identified distinct acoustic behaviours of bats that define the three  
54 foraging phases of search, approach and capture. In the search phase, most aerial hunting bats emit  
55 long and powerful cries. Upon the detection of a prey item, bats initiate the approach phase in  
56 which they call faster and gradually reduce call levels as they close in on prey. Just before capture,  
57 bats enter the terminal phase in which they emit a fast-repetition-rate buzz of short cries at low  
58 output levels. Thus, bats manipulate the rate and level of their calls to achieve dramatic acoustic  
59 gaze changes that accommodate the changing spatial relationship with their prey during capture  
60 attempts.

61 Although toothed whales must go through the same echo-guided tasks of search, approach and  
62 capture when hunting with echolocation, much less is known about the biosonar behaviour of most  
63 species during foraging. Early work (Norris et al., 1961; Morozov et al., 1972) showed that an  
64 echolocating bottlenose dolphin would reduce its inter-click intervals (ICIs) as it approached a dead  
65 fish, producing click repetition rates of some 300 Hz when close to the fish, but no functional links  
66 were made to buzzing in bats and this clicking mode received little further attention in captive  
67 studies. The next decades of biosonar research on dolphins had a strong biomimetic focus in order  
68 to understand the remarkable performance of toothed whale echolocation that may surpass that of  
69 man-made sonars (Au, 1993). All of the basic concepts and biosonar parameters used today stem  
70 from this research effort (Au, 1993). However, most of these studies involved a stationed delphinid  
71 performing an echolocation task with man-made targets at relatively long and static ranges.  
72 Remarkably, to our knowledge, no studies have been conducted to uncover in detail how a dolphin  
73 would use its sonar to do what it actually evolved for: to find and catch prey.

74 Contemporaneously with these captive studies, acoustic observations of narwhals in the wild  
75 producing fast click series prompted Miller et al. (Miller et al., 1995) to make a functional  
76 connection with the buzz of bats. However, it was not until the development of sound recording tags  
77 that this interpretation could be substantiated. It is now clear that buzzes are associated with prey  
78 capture attempts in sperm whales (Miller et al., 2004), beaked whales (Johnson et al., 2004), pilot

79 whales (Aguilar de Soto et al., 2008), porpoises (De Ruiter et al., 2009) and belugas (Ridgway et  
80 al., 2014).

81 Here we report the biosonar behaviour during prey interception in two trained specimens of the  
82 most studied delphinid species, a false killer whale (*Pseudorca crassidens* Owen, 1846) and a  
83 bottlenose dolphin (*Tursiops truncatus* Montagu, 1821) and test the hypothesis that fast repetition  
84 rate buzzing is an integral part of echolocation for prey in these species. We show that these  
85 delphinids employ range-dependent output changes when approaching prey as found in non-prey  
86 target experiments (Au and Benoit-Bird, 2003). But most prey capture attempts occur with a radical  
87 output change in the form of a high-repetition-rate, low-output buzz, suggesting a universal and  
88 strong functional convergence in the biosonar of bats and toothed whales.

## 89 **Results and discussion**

90 A total of 116 (63 herring, 53 capelin) prey capture trials with a false killer whale, Kina, and 103  
91 (42 herring, 61 capelin) trials with a bottlenose dolphin, BJ, were recorded over the course of four  
92 recording sessions per animal. Of those, 40 (20 herring, 20 capelin) trials for Kina and 72 (33  
93 herring, 61 capelin) trials for BJ generated echograms (see Material and methods and (Johnson et  
94 al., 2004)) with discernible prey echoes (Fig. 1). In general, the ability to record echoes on a tag will  
95 depend on the placement of the tag with respect to the axis of the animal's sonar beam and the  
96 sound-shading structures of its body. A false killer whale has a larger melon than does a bottlenose  
97 dolphin (see Fig. S1 in supplementary material) and this may have impacted the quality of the  
98 recordings. A number of other factors may have contributed to the variable quality of the received  
99 echo signals including: the amount of air inside the fish, and hence its target strength; the angle of  
100 approach; the proximity of the fish to other targets and the water surface, and hence the signal-to-  
101 clutter ratio. Finally, the net-pen was not separated in any way from the natural environment of  
102 Kaneohe Bay, which is abundant in snapping shrimps. The signal-to-noise ratio between sessions,  
103 or trials, could have therefore varied.

104 When discernible, the echoes could be tracked until the prey were 45-55 cm ahead of the blowhole  
105 for the false killer whale, and 25-40 cm for the bottlenose dolphin (Fig. 1), corresponding  
106 approximately to the tip of the rostra of the animals (see Fig. S1 in supplementary material), and  
107 allowing verification of the exact time of prey interception. As in free-ranging beaked whales  
108 (Johnson et al., 2004), prey engulfment by the delphinids was accompanied by a rapid change in

109 acceleration (Fig. 1) that most likely reflected movements of the musculature in the gular region,  
110 giving rise to a high-magnitude jerk signature (Ydesen et al., 2014). The signature was used to  
111 pinpoint the exact time of prey interception in trials with no discernible prey echoes in the  
112 echograms.

113 Roughly half of prey interceptions (56% and 39% of trials with Kina and BJ, respectively) were  
114 followed by distinct, isolated sequences of rapid pulsed sounds. These were short click trains of low  
115 (~2 ms for BJ and 2-5 ms for Kina), nearly constant or slightly increasing ICIs (Fig. 1) that may be  
116 analogous to the recently described victory squeals (VS) produced by trained belugas and  
117 bottlenose dolphins elsewhere (Ridgway et al., 2014). Because of their post-capture occurrence and  
118 their apparent communicative, rather than echolocation function, the VS were disregarded in further  
119 ICI analyses (e.g. Figs 2, and S2-S3 in supplementary material).

120 Both delphinids went through a series of acoustic gaze changes whilst approaching prey,  
121 culminating in a transition from regular clicking to a high-click-rate, low output buzz during the  
122 terminal approach and capture (Figs 1 and 2, and S2 in supplementary material). In 23 of the trials  
123 with Kina (15 with herring, 8 with capelin), the whale did not produce any buzz clicks (ICI<14 ms;  
124 see Fig. S3 in supplementary material) within a body length of the prey (i.e. up to 2.4 s prior to jerk  
125 peak under the assumption of Kina moving at a normal odontocete swimming speed of 2 m/s  
126 (Madsen and Surlykke 2013)). Similarly, on 12 occasions, four with herring and eight with capelin,  
127 BJ captured a fish without transitioning into a buzz within 1.2 m from jerk peak. However, the  
128 majority (>75%) of prey interceptions in both animals were accompanied by buzzing.

### 129 *Acoustic gaze adjustments in the approach phase*

130 During most prey approaches, both the bottlenose dolphin and the false killer whale gradually  
131 reduced their ICIs and output levels roughly proportionate with reducing target range (Figs 1 and 2,  
132 and S2 in supplementary material), as has been seen for free-ranging delphinids approaching  
133 hydrophone arrays (Au and Benoit-Bird, 2003). Thus, the concept of automatic gain control to  
134 compensate for a reduced transmission loss with decreasing target range also seems to be applicable  
135 to some degree in delphinids approaching small prey items. Yet, both animals exercised a degree of  
136 flexibility in their biosonar sampling; either they gradually decreased ICI with decreasing target  
137 range, like harbour porpoises (Fig. 2; (Madsen and Surlykke, 2013)), or kept a wide auditory scene  
138 by maintaining relatively constant clicking rates prior to buzzes, akin to beaked whales (Fig. 2;

139 (Madsen and Surlykke, 2013)). This suggests that ICI adjustments in the approach may not always  
140 be necessary or advantageous. These delphinids, and perhaps all toothed whales, seem to have a  
141 preferred strategy, but they may switch between, and perhaps combine, different degrees of  
142 adjustments, depending on the environment and the echolocation task at hand.

#### 143 *Buzzing during prey captures*

144 A much more dramatic change in the acoustic gaze, featuring increased click repetition rates and  
145 >10-fold output level reduction, occurred at the transition to a buzz (Fig. 2), which was initiated at a  
146 median range of 0.6 (IQR, 0.4-0.1, Kina) and 1.5 (IQR, 0.8-1.9, BJ) meter from the prey (assuming  
147 an upper ICI limit for the onset of buzz of 14 ms for Kina and 16 ms for BJ (see Fig. S3 in  
148 supplementary material) and correcting for distance between the sound source and the tip of the  
149 rostrum). Both delphinids buzzed with click repetition rates on the order of 250-500 clicks/second  
150 (Figs 2 and S2), and used short buzz durations of 1 (0.6-1.5) and 0.6 (0.1-1.3) second for BJ and  
151 Kina, respectively, with a tendency toward longer buzzes in trials with preceding gradual ICI  
152 changes (Fig. 2). The high sampling rates during the buzz are comparable to the high-rate click  
153 trains, variously coined mews or creaks, reported in early studies (Norris et al., 1961; Morozov et  
154 al., 1972). These rates are similar to those found in buzzing porpoises (De Ruiter et al., 2009) but  
155 slightly faster than those of similar-sized beaked whales (Fig. 2). They therefore deviate from a  
156 simple size scaling, but support the recently-proposed hypothesis that biosonar sampling rates  
157 during capture are scaled with manoeuvrability of toothed whales (Madsen and Surlykke, 2013) as  
158 well as perhaps the agility of their preferred prey.

159 Both during the approach and capture phases, the ICIs were consistently longer than the two-way-  
160 travel time to the prey, but in the buzz the lag time, i.e., the time between the arrival of the prey  
161 echo and the subsequent click, was reduced to 1.5-4 ms just before target interception (Fig. 2). This  
162 suggests that ICI is adjusted throughout the buzz to avoid target echo ambiguity (Madsen and  
163 Surlykke, 2013). Such adjustments reveal an acute vocal-motor control that is finely tuned to the  
164 echo delays to targets of interest (Wisniewska et al., 2012). The ICI dynamics shown here (Fig. 2)  
165 further imply that the concept of a fixed lag time of approximately 20 ms for echo processing, found  
166 for stationed dolphins performing target detection tasks (Au, 1993), is unsupported for free-  
167 swimming delphinids targeting prey. The very short lag times found during buzzes and their wide  
168 variability suggest that the lag time may have little connection with cognitive processing time in a  
169 buzz.

170 *Universality of buzzing in toothed whales?*

171 Despite having been in captivity for many years and being faced with an easy task of intercepting a  
172 dead fish in the well-lit waters of a familiar net-pen, the trained delphinids studied here displayed  
173 stereotyped buzz behaviour very similar to that reported from diverse toothed whale species when  
174 catching prey in the wild. This suggests that high-rate biosonar sampling is a deeply integrated part  
175 of close-range target interception in a toothed whale. We propose that buzzing, although hitherto  
176 largely overlooked in captive animals, is a universal and critical key to biosonar-based interception  
177 of prey in toothed whales, as is the case for bats hunting prey on the wing.

178 **Materials and methods**

179 Experiments were conducted in a 12x12 m net-pen at the University of Hawaii Marine Mammal  
180 Facility with a 28-year-old female bottlenose dolphin, BJ, and a >26-year-old, female false killer  
181 whale, Kina. Animals were trained to wear a DTAG-3 multi-sensor tag (Woods Hole  
182 Oceanographic Institution, Woods Hole, MA, USA) that simultaneously records stereo sound at a  
183 sampling rate of 500 kHz (16-bit resolution, 178 dB re 1 $\mu$ Pa clip level) and samples tri-axial  
184 accelerometers at 500 Hz. The suction-cup attached tag was placed dorsally behind the blowhole  
185 (Fig. S1) to ensure good quality recordings of outgoing clicks and to maximize the chance of  
186 recording faint echoes. Each session started with the animal stationed at the trainer after which three  
187 dead fish (10-15cm capelin or 20-25cm herring, estimated target strength of -35 to -40 dB) were  
188 introduced in opposite ends of the pen. The tagged animal was then sent towards the fish for  
189 interception at depths between 0.5 and 2m. Each session was filmed using an in-air Sony  
190 camcorder, synchronized with the DTAG-3 by tapping the tag hydrophones in front of the camera,  
191 allowing for visual verification of the time of prey ingestion on the DTAG-3 with <1 second of  
192 error.

193 Analyses were performed using Matlab (Mathworks, Natick, MA, USA). Clicks from tag  
194 recordings were extracted with a supervised click detector. Relative apparent output level (RAOL)  
195 of the clicks (Wisniewska et al., 2012) was computed as peak-peak received level in dB re  
196 maximum level in the trial, and ICIs were calculated as time intervals between each click and the  
197 preceding click. For each species, we used a change in the distributions of ICIs of all trials as the  
198 border value between buzz and regular clicks (see Fig. S3 in supplementary material). Clicks with  
199 ICIs <14ms for Kina and <16ms for BJ were accordingly classified as being part of a buzz. Time-

200 range echograms (Johnson et al., 2004) were formed by time-aligning the signal recorded in a time  
201 window from -0.5ms to +6.5ms around each click, and subsequent color-coding by intensity. The  
202 width of each time bin in the echogram was adjusted to the ICI of that click to provide a time  
203 resolution matching the animal's sampling rate and to form a time axis compatible with the video  
204 recording (Johnson et al., 2004). Echo range was computed as half the time delay between the  
205 emitted click and the returning echo divided by a sound speed of 1534 m/s. To investigate possible  
206 change in the animals' movement patterns accompanying prey interception, we computed  
207 acceleration rate, or jerk, of the whales for the duration of the trials (Ydesen et al., 2014). The  
208 accelerometer data were low-pass filtered at 30 Hz (6<sup>th</sup> order Butterworth filter) and the total jerk  
209 was computed at each time instant as the norm of the differential of the acceleration for each axis  
210 (Ydesen et al., 2014).

### 211 **Acknowledgments**

212 S.Vlachos, C.Quintos, M.Breese, students and staff are thanked for assistance in the experiments  
213 conducted under University of Hawaii IACUC protocol 09-712 and US Marine Mammal Permit  
214 no.978-1567 issued to PN.

### 215 **Competing interests**

216 The authors declare no competing interests.

### 217 **Author contributions**

218 DMW, PTM and PN planned and performed the experiments. DMW and MJ provided analytical  
219 tools. DMW analyzed the data. All authors contributed to the interpretation of the data. PTM and  
220 DMW wrote the manuscript. All authors edited the manuscript prior to submission.

### 221 **Funding**

222 The work was funded by the Danish National Research Foundation (FNU) frame grants to PTM,  
223 and an Oticon Foundation PhD stipend to DMW. MJ was supported by Marine Alliance for Science  
224 and Technology for Scotland and a Marie Curie Career Integration Grant.

225

226



227 **References**

- 228 **Aguilar de Soto, N., Johnson, M. P., Madsen, P. T., Diaz, F., Dominguez, I., Brito, A. and**  
229 **Tyack, P.** (2008). Cheetahs of the deep sea: deep foraging sprints in short-finned pilot whales off  
230 Tenerife (Canary Islands). *Journal of Animal Ecology* **77**, 936-947.
- 231 **Au, W. W. L.** (1993). The sonar of dolphins. New York: Springer-Verlag.
- 232 **Au, W. W. L. and Benoit-Bird, K. J.** (2003). Automatic gain control in the echolocation system of  
233 dolphins. *Nature* **423**, 861-863.
- 234 **De Ruiter, S., Bahr, A., Blanchet, M. A., Hansen, S. F., Kristensen, J. H., Madsen, P. T.,**  
235 **Tyack, P. L. and Wahlberg, M.** (2009). Acoustic behaviour of echolocating porpoises during prey  
236 capture. *The Journal of Experimental Biology* **212**, 3100-3107.
- 237 **Griffin, D. R., Webster, F. A. and Michael, C. R.** (1960). The echolocation of flying insects by  
238 bats. *Animal Behaviour* **8**, 141-154.
- 239 **Johnson, M., Madsen, P. T., Zimmer, W. M. X., Aguilar de Soto, N. and Tyack, P. L.** (2004).  
240 Beaked whales echolocate on prey. *Biology Letters* **271**, S383-S386.
- 241 **Madsen, P. and Surlykke, A.** (2013). Functional convergence in bat and toothed whale.  
242 *Physiology* **28**, 276-283.
- 243 **Miller, L. A., Pristed, J., Møhl, B. and Surlykke, A.** (1995). The click sounds of narwhals  
244 (*Monodon monoceros*) in Inglefield bay, Northwest Greenland. *Marine Mammal Science* **11**, 491-  
245 502.
- 246 **Miller, P. J. O., Johnson, M. P. and Tyack, P. L.** (2004). Sperm whale behaviour indicates the  
247 use of echolocation click buzzes 'creaks' in prey capture. *Proceedings of the Royal Society of*  
248 *London Series B - Biological Sciences* **271**, 2239-2247.
- 249 **Morozov, V. P., Akopian, A. I., Burdin, V. I., Zaitseva, K. A. and Sokovykh, Y. A.** (1972).  
250 Tracking frequency of the location signals of dolphins as a function of distance to the target.  
251 *Biofizika* **17**, 139-145.
- 252 **Norris, K. S., Prescott, J. H., Asa-Dorian, P. V. and Perkins, P.** (1961). An experimental  
253 demonstration of echolocation behavior in the porpoise, *Tursiops truncatus* (Montagu). *Biological*  
254 *Bulletin* **120**, 163-176.
- 255 **Ridgway, S., Moore, P., Carder, D. and Romano, T.** (2014). Forward shift of feeding buzz  
256 components of dolphins and belugas during associative learning reveals a likely connection to  
257 reward expectation, pleasure and brain dopamine activation. *The Journal of Experimental Biology*  
258 **217**, 2910-2919.

259 **Wisniewska, D. M., Johnson, M., Beedholm, K., Wahlberg, M. and Madsen, P. T.** (2012).  
260 Acoustic gaze adjustments during active target selection in echolocating porpoises. *The Journal of*  
261 *Experimental Biology* **215**, 4358-4373.

262 **Ydesen, K. S., Wisniewska, D. M., Hansen, J. D., Beedholm, K., Johnson, M. and Madsen, P.**  
263 **T.** (2014). What a jerk: prey engulfment revealed by high-rate, super-cranial accelerometry on a  
264 harbour seal (*Phoca vitulina*). *The Journal of Experimental Biology* **217**, 2239-2243.

265

266

267

268

269

270

271

272

273

274

275

276

277

278

279

280

281

282

283 **Figure legends**

284 **Figure 1.** Echolocation of prey by a false killer whale (A,B,C) and a bottlenose dolphin (D,E,F).  
285 (A,D) Echograms (Johnson et al., 2004) displaying sonar clicks and echoes recorded by a DTAG-3.  
286 y-axis indicates time elapsed from emitted clicks to returning echoes expressed as target range.  
287 Clicks emitted at ICIs shorter than the 6.5-ms time window presented here are displayed repeatedly  
288 in the vertical axis. The colour scale indicates signal energy from blue (faint) to red (intense). (B,E)  
289 Inter-click intervals colour-coded for relative apparent output level of signals. VS marks victory  
290 squeals. (C,F) Jerk, or rate of change of acceleration as recorded by the DTAG.

291 **Figure 2.** Delphinid echolocation behaviour during prey capture. Inter-click intervals (ICIs) of the  
292 false killer whale (A), the bottlenose dolphin (B), and three other toothed whale species (adapted  
293 from (Madsen and Surlykke, 2013)) (C). ICIs are colour-coded for relative apparent output level of  
294 signals. Dashed and dotted lines at the bottom of each plot mark target ranges (shown by the right-  
295 hand y-axis) estimated from the echograms (Fig. 1) for trials with the lowest ICI values in the buzz  
296 (drawn with matching line styles). Pooled ICI and RAOL data from all trials for Kina (A) and BJ  
297 (B) (see Fig. S2 in supplementary material) have been grouped into logarithmically increasing time  
298 bins (time from jerk peak) to form box plots, showing the 25<sup>th</sup>, 50<sup>th</sup> (median) and 75<sup>th</sup> percentiles  
299 (lower, mid and upper lines in the box) of the respective parameters within each time bin. Whiskers  
300 extend to the most extreme data points within 1.5 interquartile ranges. Values outside of those  
301 ranges are marked with crosses.

302 **Supplementary material**

303 **Figure S1.** DTAG-3 (12x2x7 cm) placement on the false killer whale (a) and the bottlenose dolphin  
304 (b) was chosen to ensure good quality recordings of outgoing clicks and to maximize the chance of  
305 recording faint echoes. The hydrophones are the two small yellow spherical elements on the front of  
306 the tag closest to the blowhole. The suction cup closest to the blowhole encases accelerometers  
307 (data not used in the present study); below which is a supporting suction cup.

308 **Figure S2.** Inter-click intervals colour-coded for relative apparent output level of signals emitted by  
309 the false killer whale (A,B) and the bottlenose dolphin (C,D) during all prey capture trials with  
310 small (capelin (A,C)) and large (herring (B,D)) fish.

311 **Figure S3.** Distribution of inter-click intervals (ICI) used by the false killer whale (Kina, A) and the  
312 bottlenose dolphin (BJ, B) during prey captures of small (capelin) and large (herring) fish. Bin  
313 width is 1 ms. The peaks centered on 2 ms for Kina and 3-4 ms for BJ correspond with the  
314 dominant ICI for buzz clicks. The plateaus between 15-25 ms (Kina) and 15-40 ms (BJ) mark the  
315 dominant ICI range for regular clicks. We used a change in the distributions of ICIs (at 14 ms for  
316 Kina and 16 ms for BJ, as marked by the dashed line) as the border value between buzz and regular  
317 clicks.

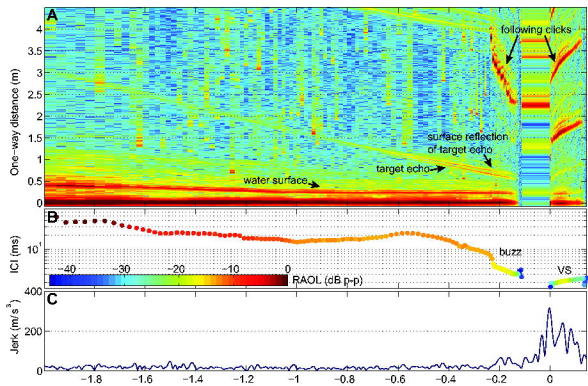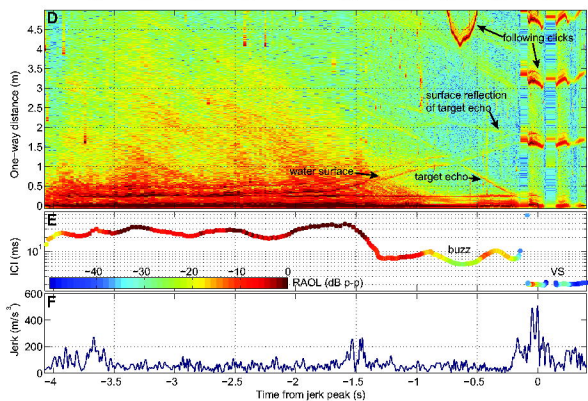

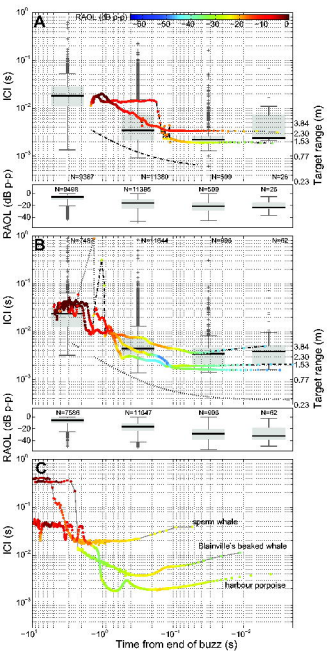

Source: https://cob.silverchair.com/jeb/article-pdf/doi/10.1242/jeb.113415/2033242/jeb_113415.pdf
